# Supplementary material for: Novel NiCoMn–PDC MOFs: a dual-functional material for electrocatalytic water splitting and hybrid supercapacitor applications
Source: Royal Society of Chemistry journal article supplement (doi:10.1039/d5ra05650k), 2025-01-01
Supplement: d5ra05650k1.pdf [file d5ra05650k1.pdf]

## **Supplementary Information**

### **Novel NiCoMn-PDC MOFs: A dual functional material for electrocatalytic water splitting and hybrid supercapacitor applications**

Sharif Ullah<sup>a,†</sup>, Khurram Imran Khan<sup>a,\*,†</sup>, Muhammad Ramzan Abdul Karim<sup>a,\*,†</sup>, Anique Ahmed<sup>b,†</sup>

<sup>a</sup>Faculty of Materials and Chemical Engineering, Ghulam Ishaq Khan Institute of Engineering Sciences and Technology, Topi, 23640, Khyber Pakhtunkhwa, Pakistan

<sup>b</sup>Faculty of Engineering Sciences, Ghulam Ishaq Khan Institute of Engineering Sciences and Technology, Topi, 23640, Khyber Pakhtunkhwa, Pakistan

\*Correspondence: Muhammad Ramzan Abdul Karim ([ramzan1109@hotmail.com](mailto:ramzan1109@hotmail.com) / [ramzan.karim@giki.edu.pk](mailto:ramzan.karim@giki.edu.pk))  
[Khurram Imran Khan \(khurram@giki.edu.pk\)](mailto:Khurram.Imran.Khan@giki.edu.pk)

† All authors contributed equally

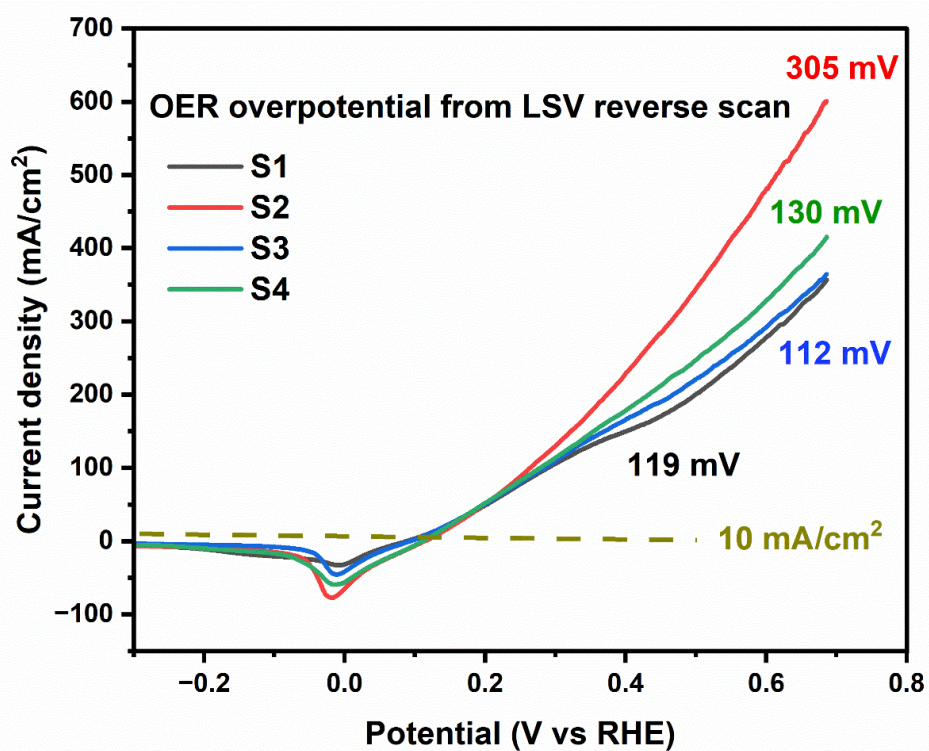

**Fig. S1** OER overpotential is calculated from the reverse Linear sweep voltammetry (LSV) scan for samples S1–S4 under identical conditions. (Lu, 2024)

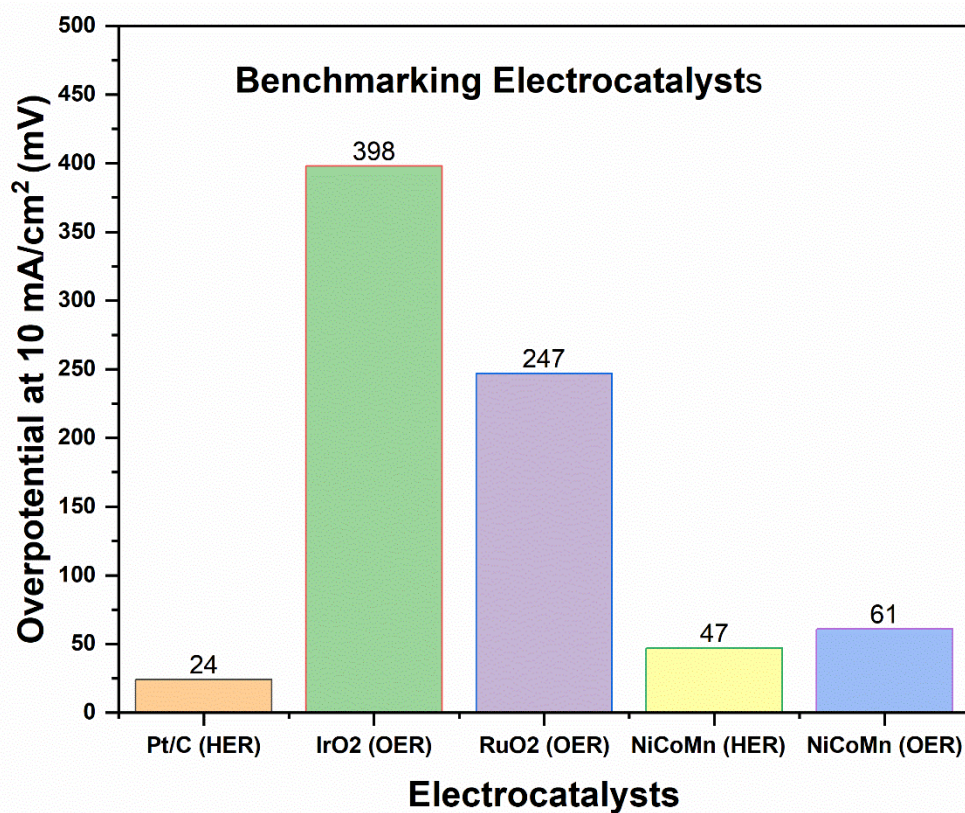

**Fig. S2** Benchmarking HER and OER overpotentials of the NiCoMn catalyst against commercial (Pt/C), (IrO<sub>2</sub>), and (RuO<sub>2</sub>), highlighting its superior bifunctional activity.

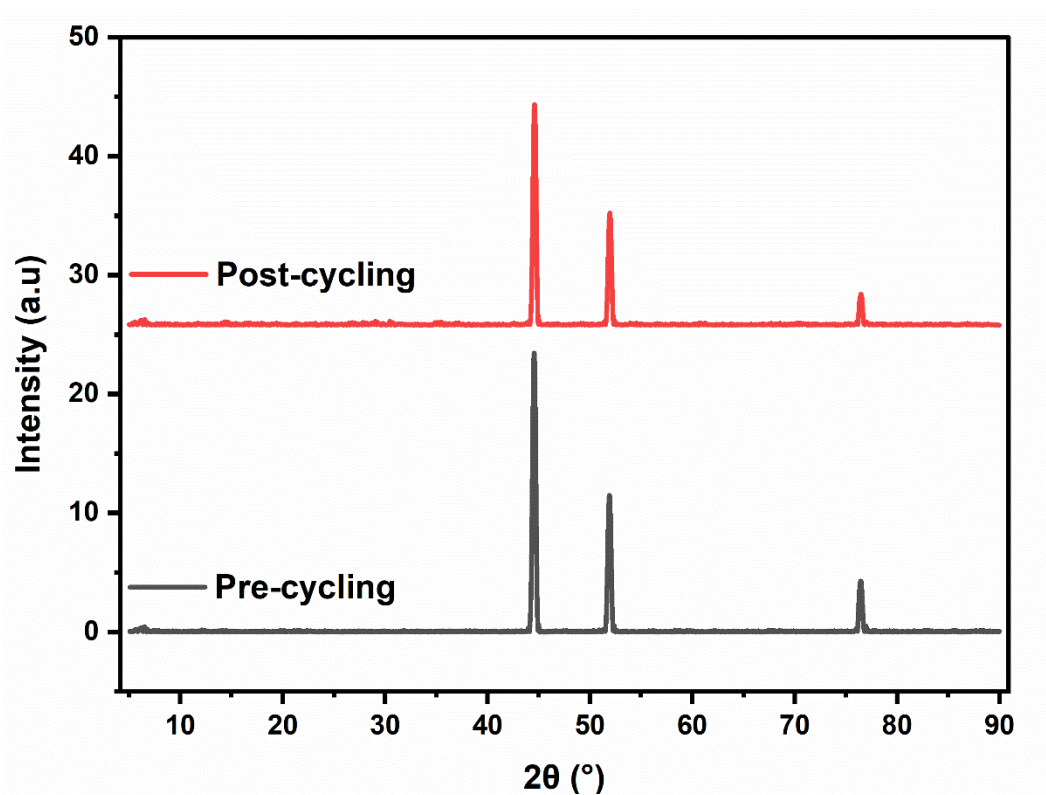

**Fig. S3** XRD patterns of the electrode material before and after 5,000 cycles, confirming excellent structural stability without phase changes.



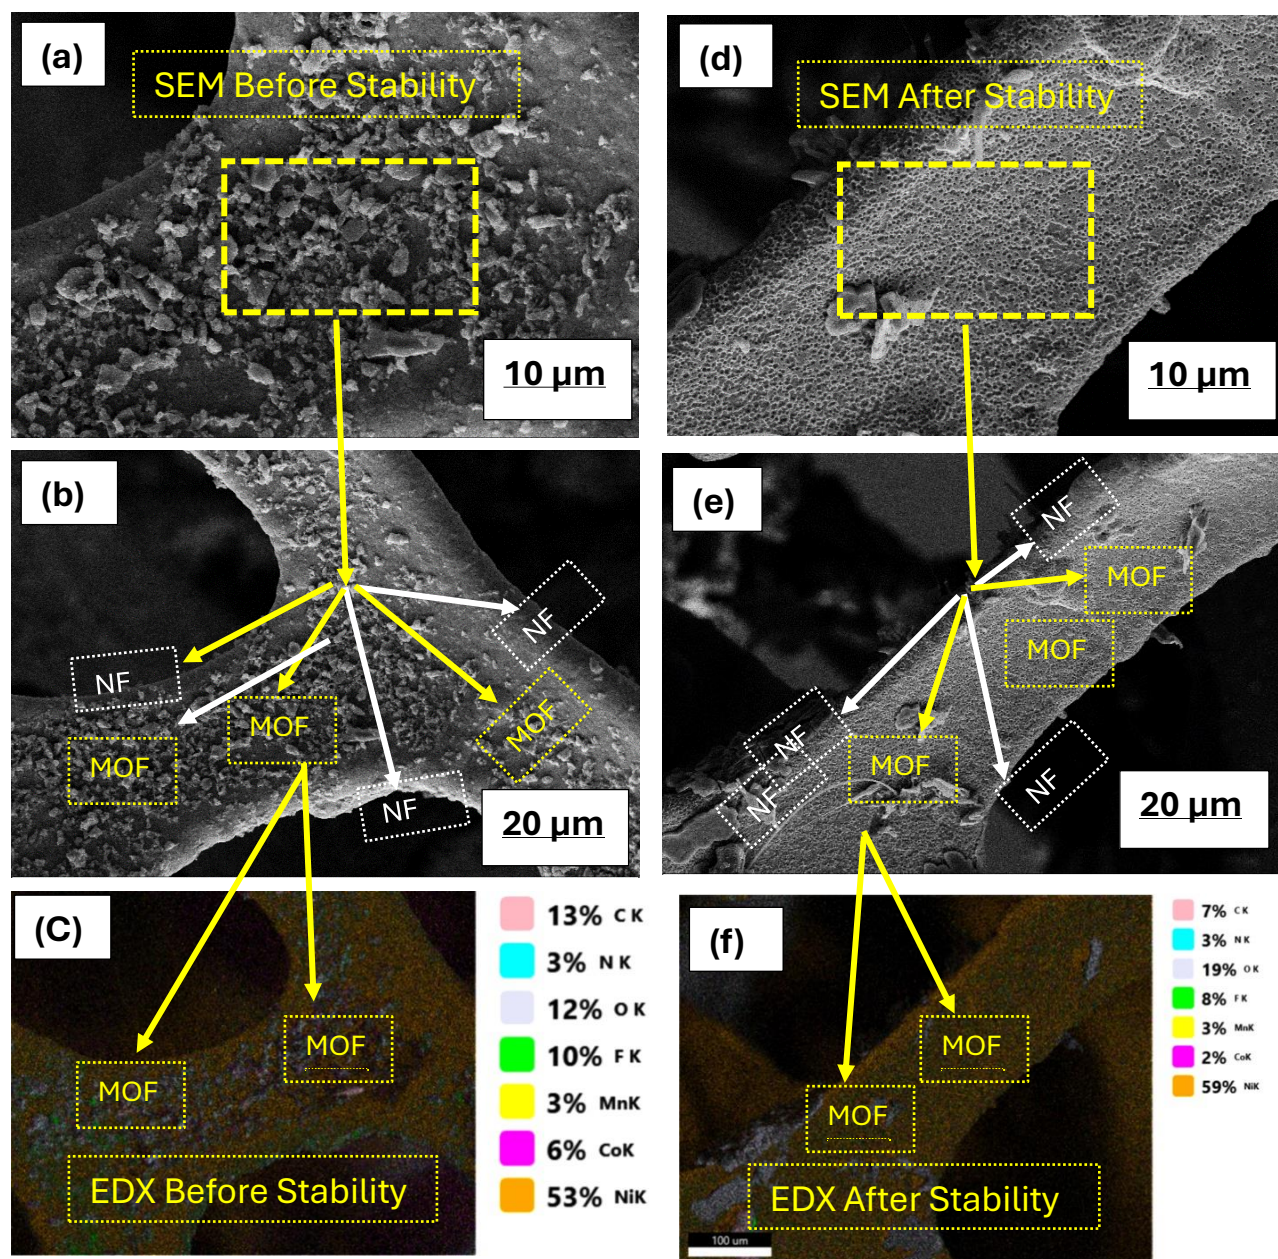

**Fig. S4** SEM/EDX of NiCoMn-PDC MOF/NF. (a) SEM pre (10  $\mu\text{m}$ ); (b) magnified pre (20  $\mu\text{m}$ ); (c) EDX pre (100  $\mu\text{m}$ ); (d) SEM post (10  $\mu\text{m}$ ); (e) magnified post (20  $\mu\text{m}$ ); (f) EDX post (100  $\mu\text{m}$ ). Colors denote atomic %.



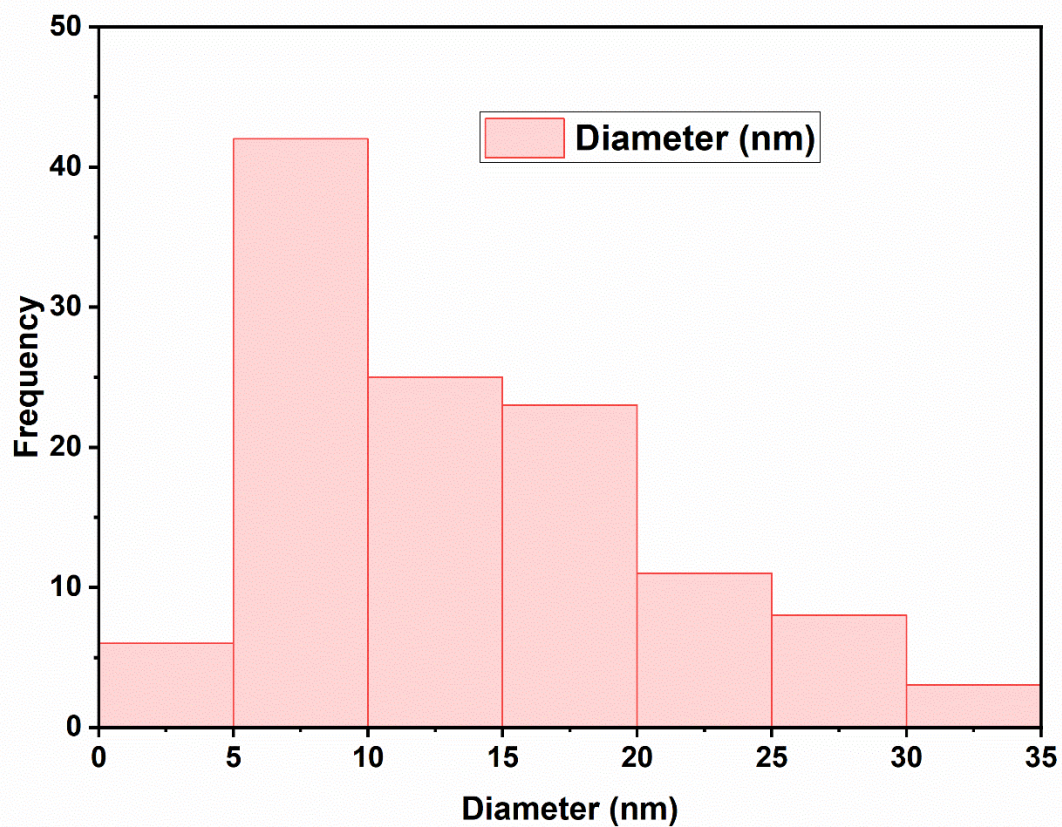

Fig. S5 Diameter distribution of S2 nanostrips from SEM analysis, confirming their ultrathin average diameter of ~7.9 nm.

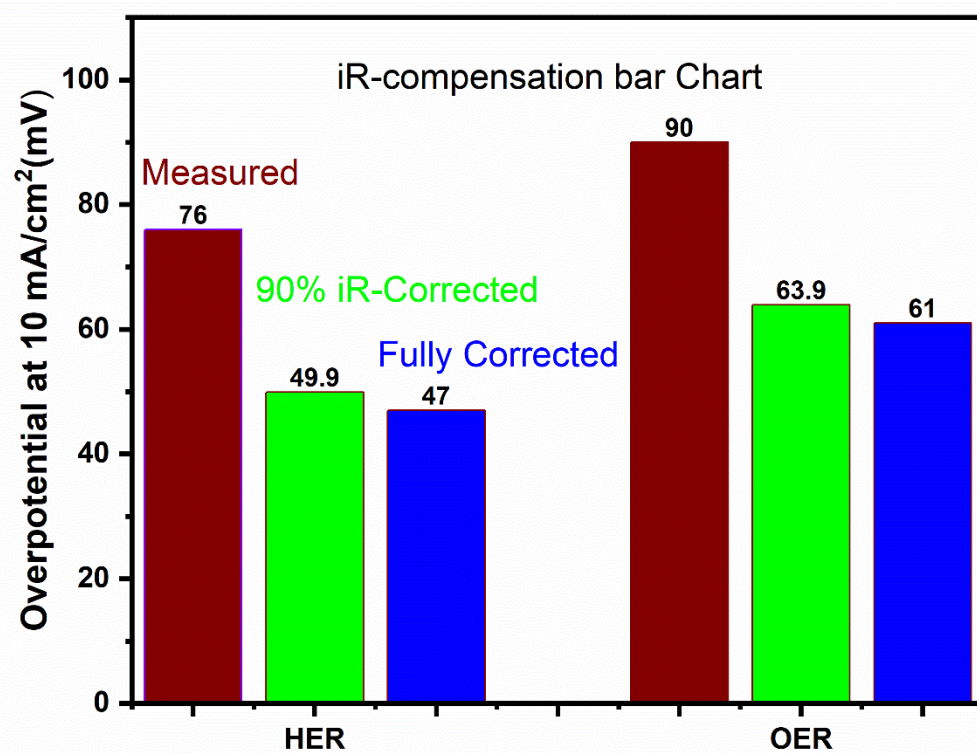

Fig. S6 iR-compensated HER and OER overpotentials of sample S2, confirming its intrinsic catalytic activity comparable to noble metal benchmarks.

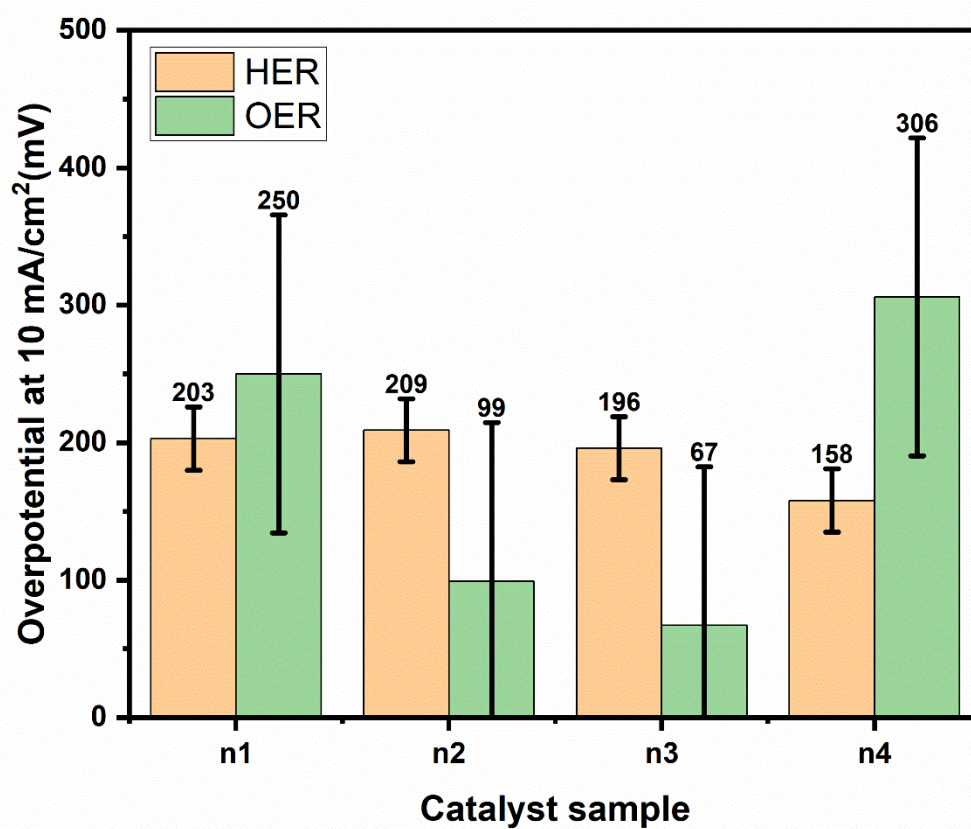

**Fig. S7** Bar chart showing mean overpotentials  $\pm$  SD ( $n = 4$ ) for HER and OER based on optimized sample S2.



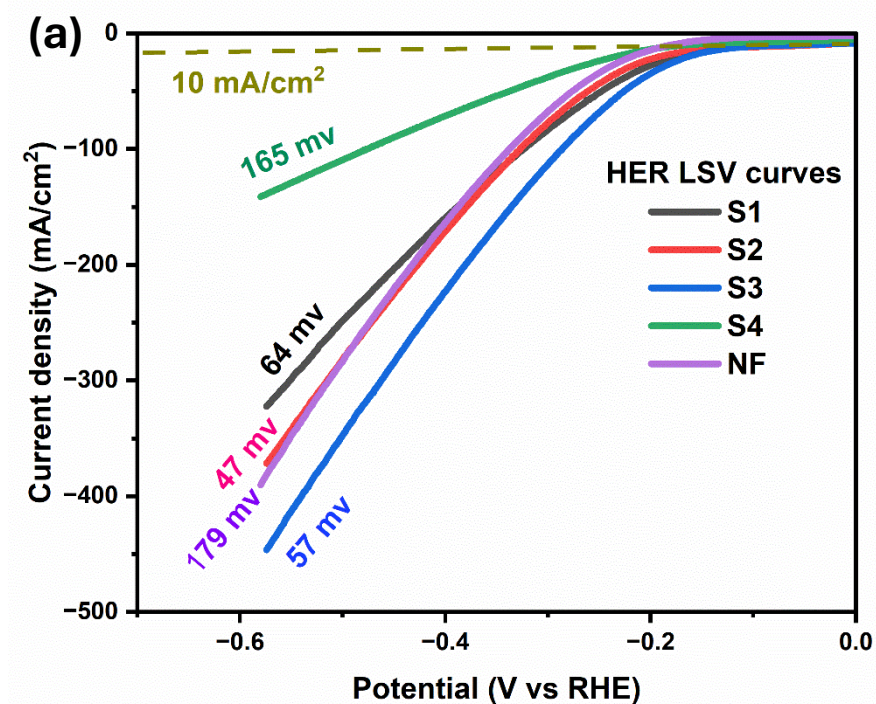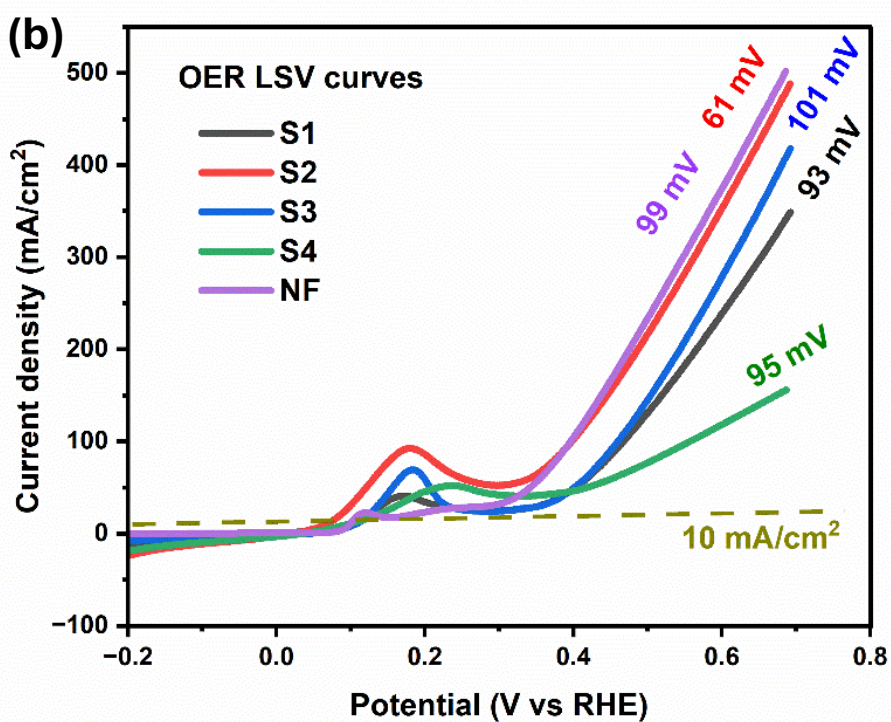

**Fig. S8** Linear sweep voltammetry (LSV) curves for (a) HER and (b) OER of composition S1–S4 recorded under identical conditions for Ni foam (NF) control.

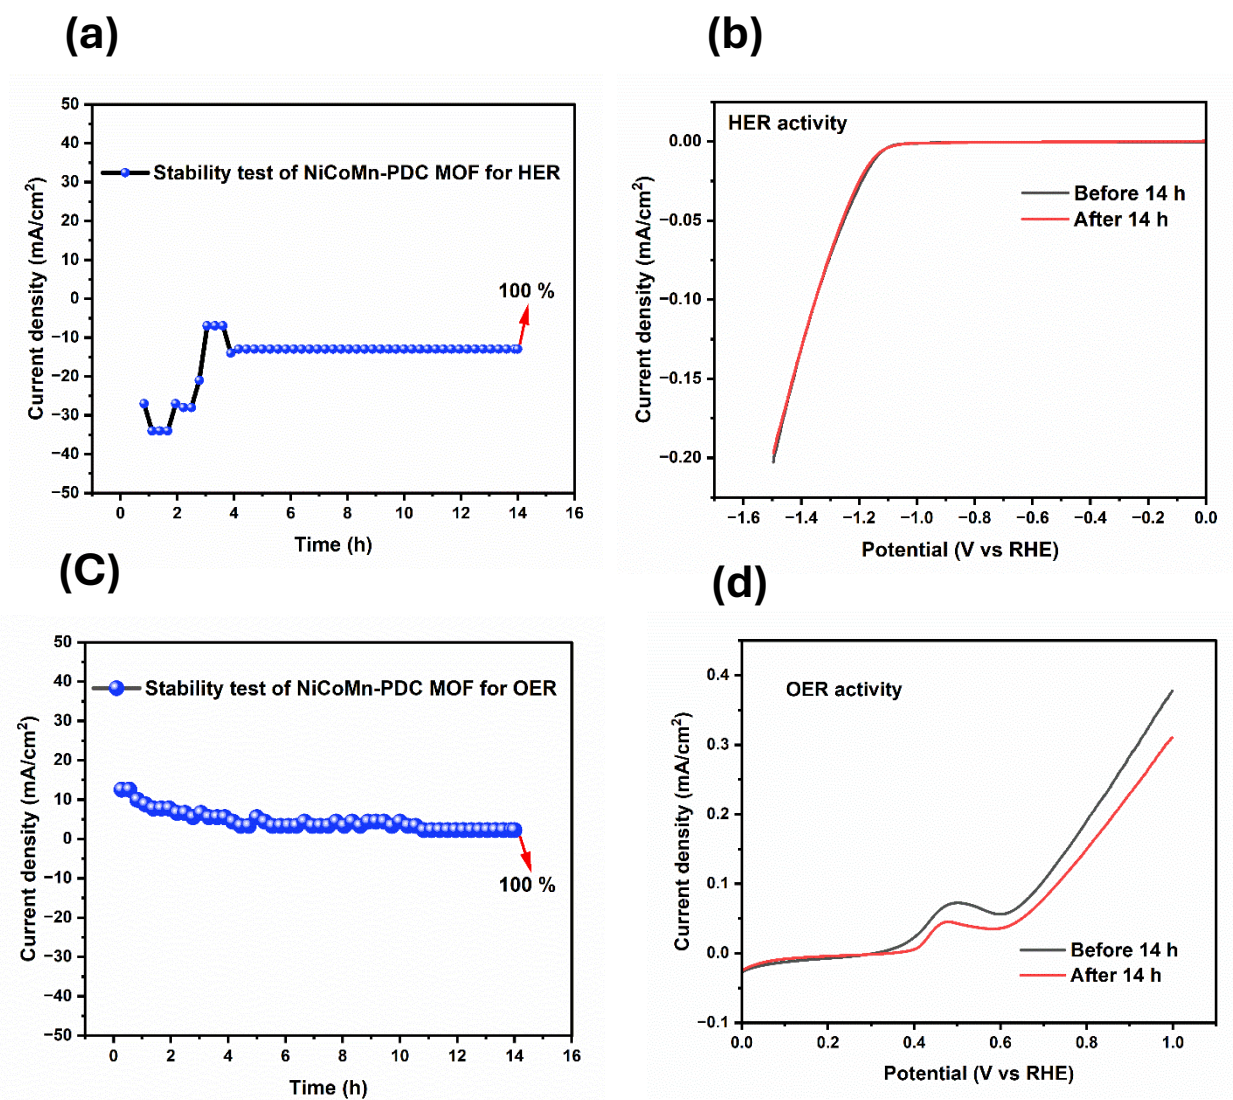

**Fig. S9** Stability tests of NiCoMn-PDC MOF. (a) Chronoamperometry for HER over 14 h. (b) LSV curves for HER before and after 14 h stability test. (c) Chronoamperometry for OER over 14 h. (d) LSV curves for OER before and after 14 h stability test.



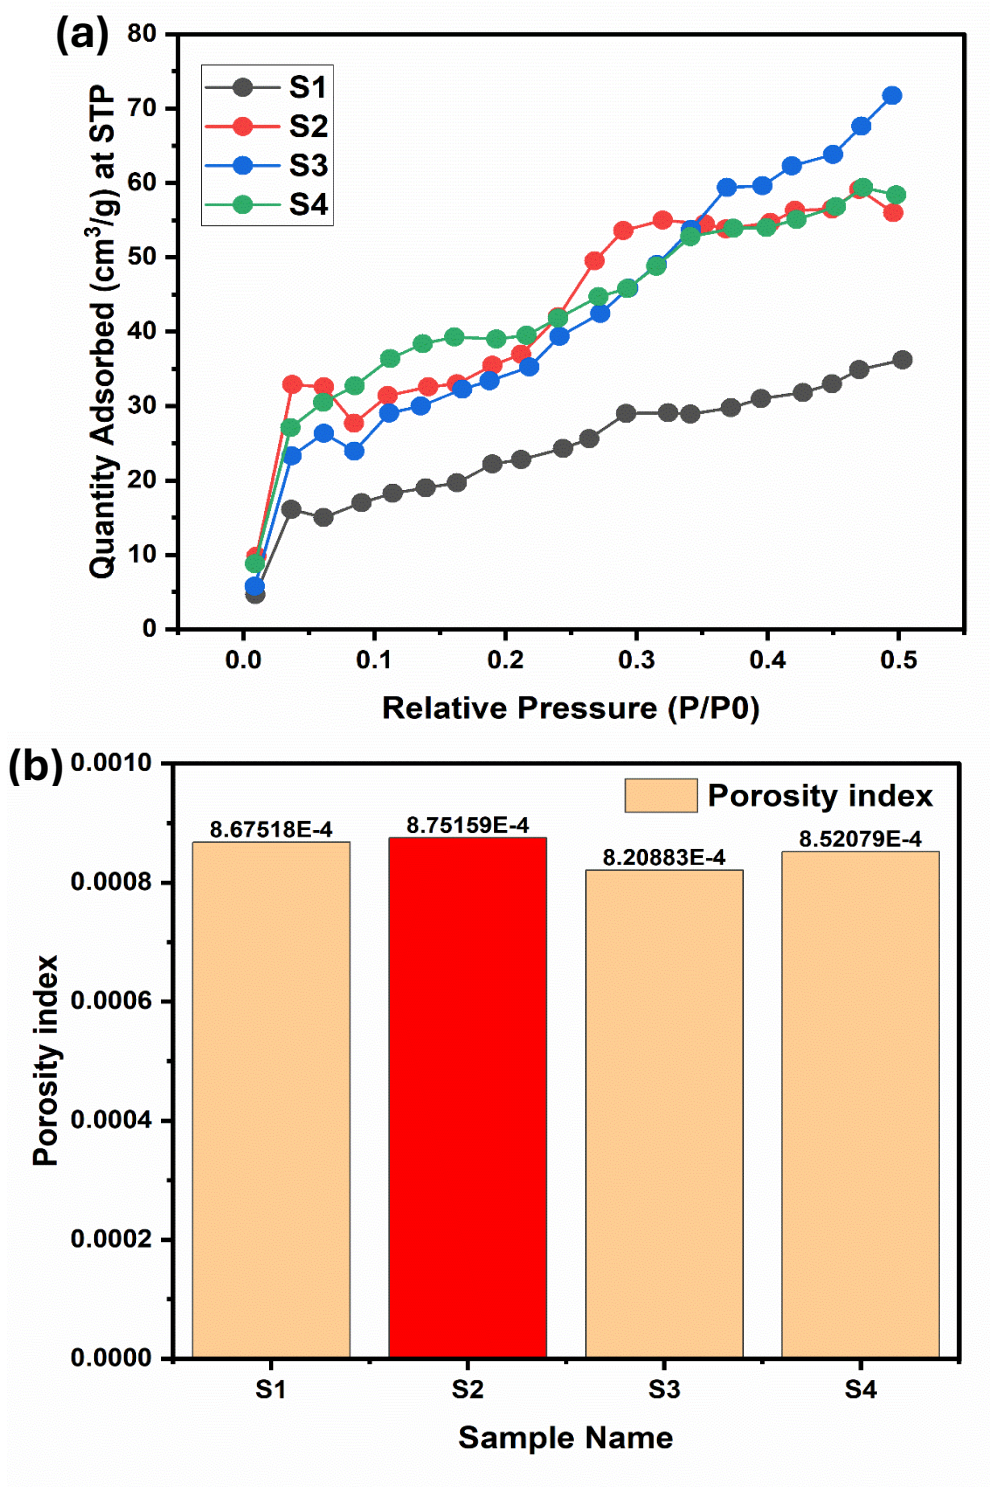

**Fig. S10** (a) Nitrogen adsorption-desorption isotherms of catalysts S1-S4 recorded at 77 K, showing typical mesoporous behavior. (b) Porosity index of each catalyst, calculated as the ratio of total pore volume ( $\text{cm}^3 \text{g}^{-1}$ ) to BET surface area ( $\text{m}^2 \text{g}^{-1}$ ).

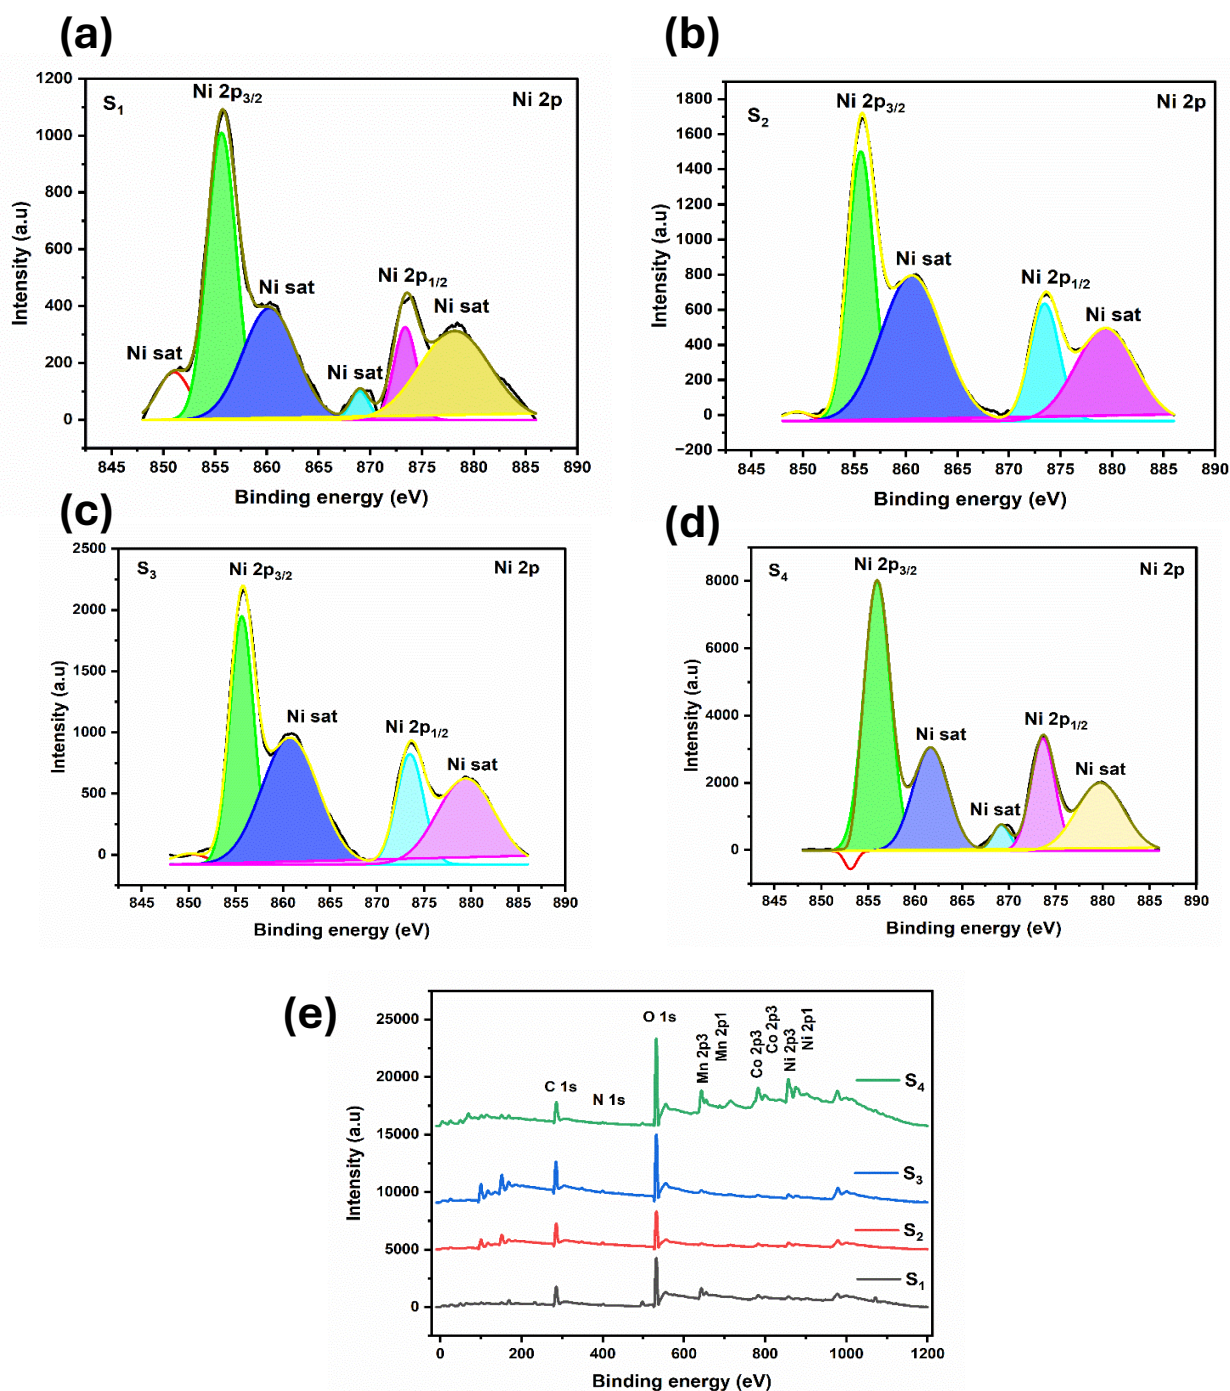

**Fig. S11** Deconvoluted XPS spectra of Ni 2p for Ni-Co-Mn-PDC MOFs based on compositions (a) S<sub>1</sub>, (b) S<sub>2</sub>, (c) S<sub>3</sub>, and (d) S<sub>4</sub>, showing presence of Mn<sup>2+</sup>/Mn<sup>3+</sup> redox states. (e) Survey spectrum for composition S<sub>1</sub> to S<sub>4</sub>.



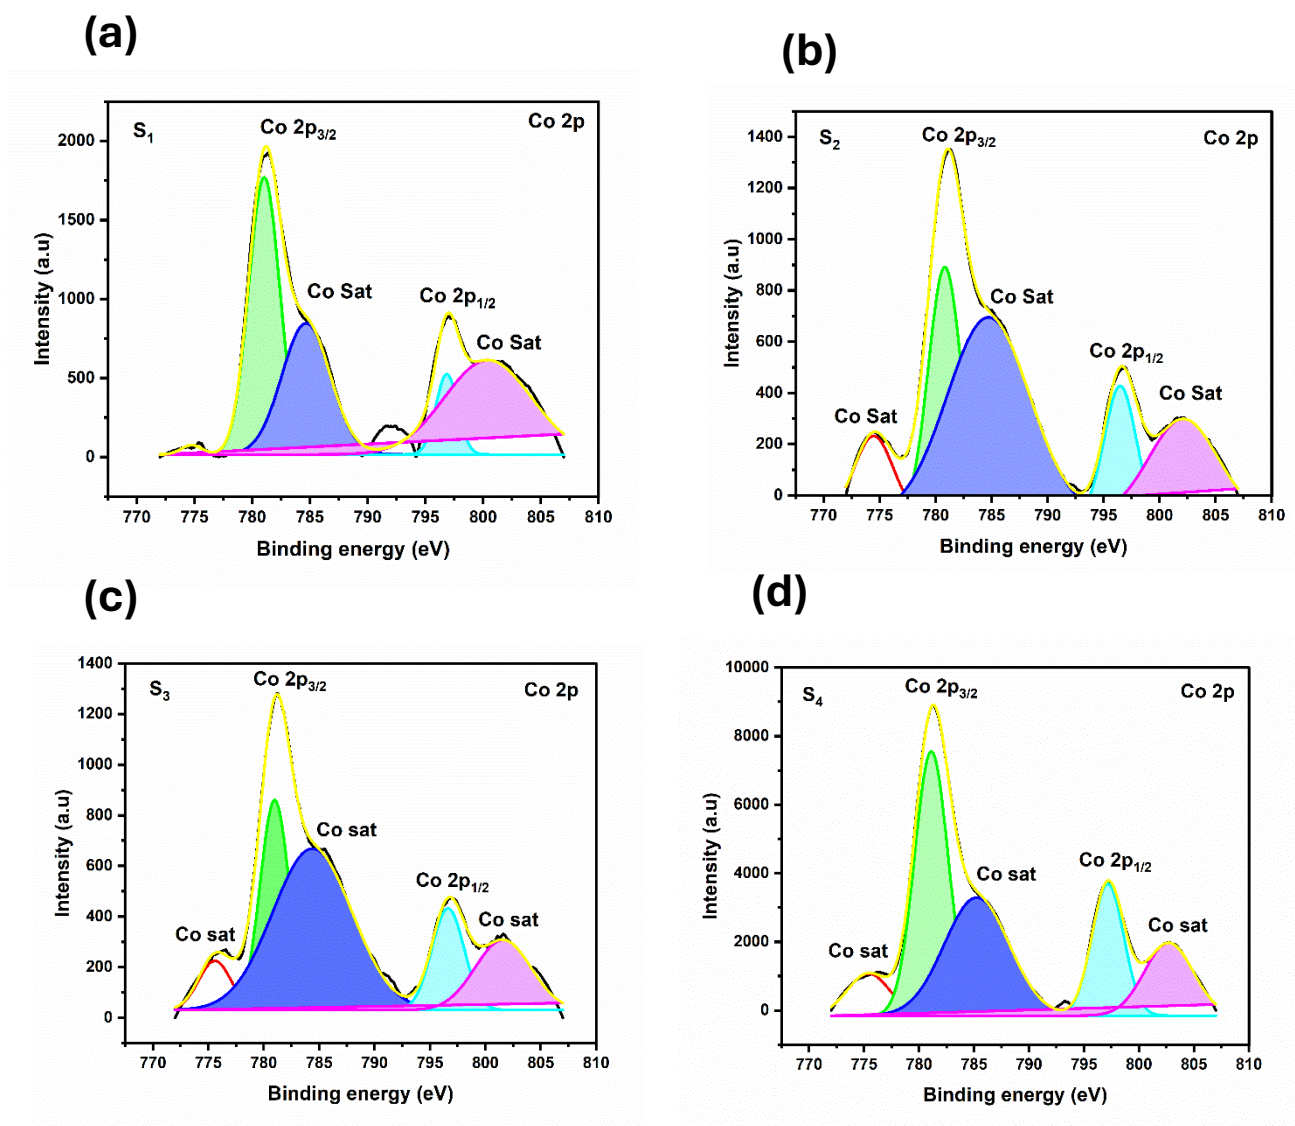

**Fig. S12** Deconvoluted XPS spectra of Co 2p for Ni-Co-Mn-PDC MOFs based on compositions (a) S1, (b) S2, (c) S3, and (d) S4, showing presence of Mn<sup>2+</sup>/Mn<sup>3+</sup> redox states.

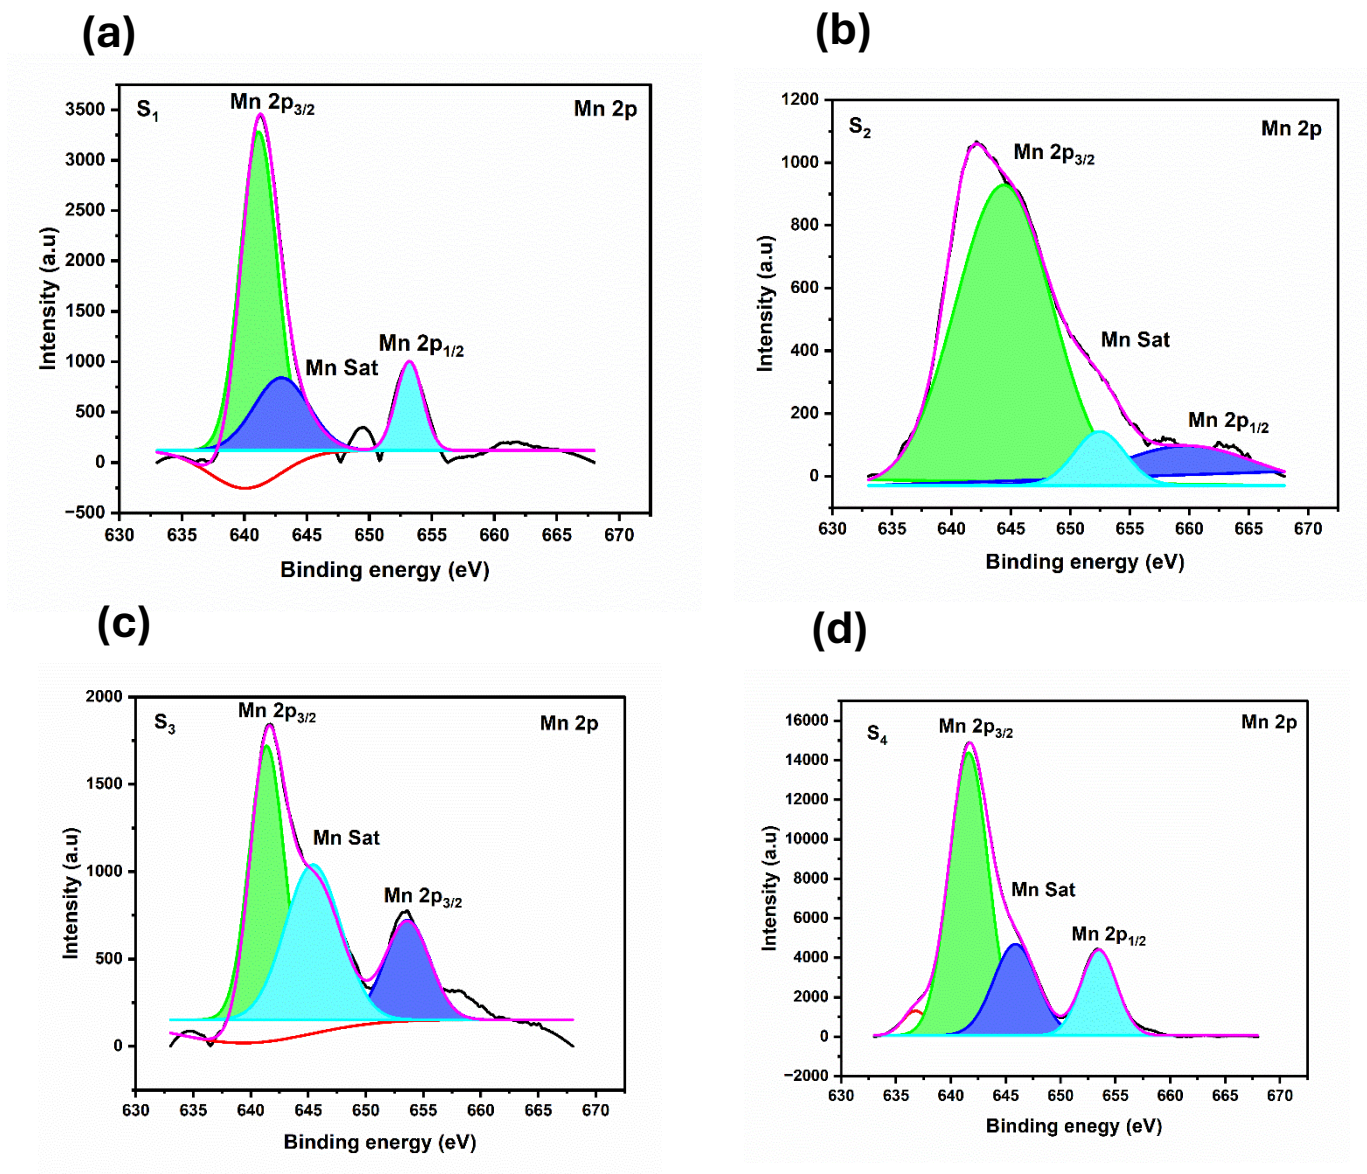

**Fig. S13** Deconvoluted XPS spectra of Mn 2p for Ni-Co-Mn-PDC MOFs based on compositions (a) S1, (b) S2, (c) S3, and (d) S4, showing presence of Mn<sup>2+</sup>/Mn<sup>3+</sup> redox states.



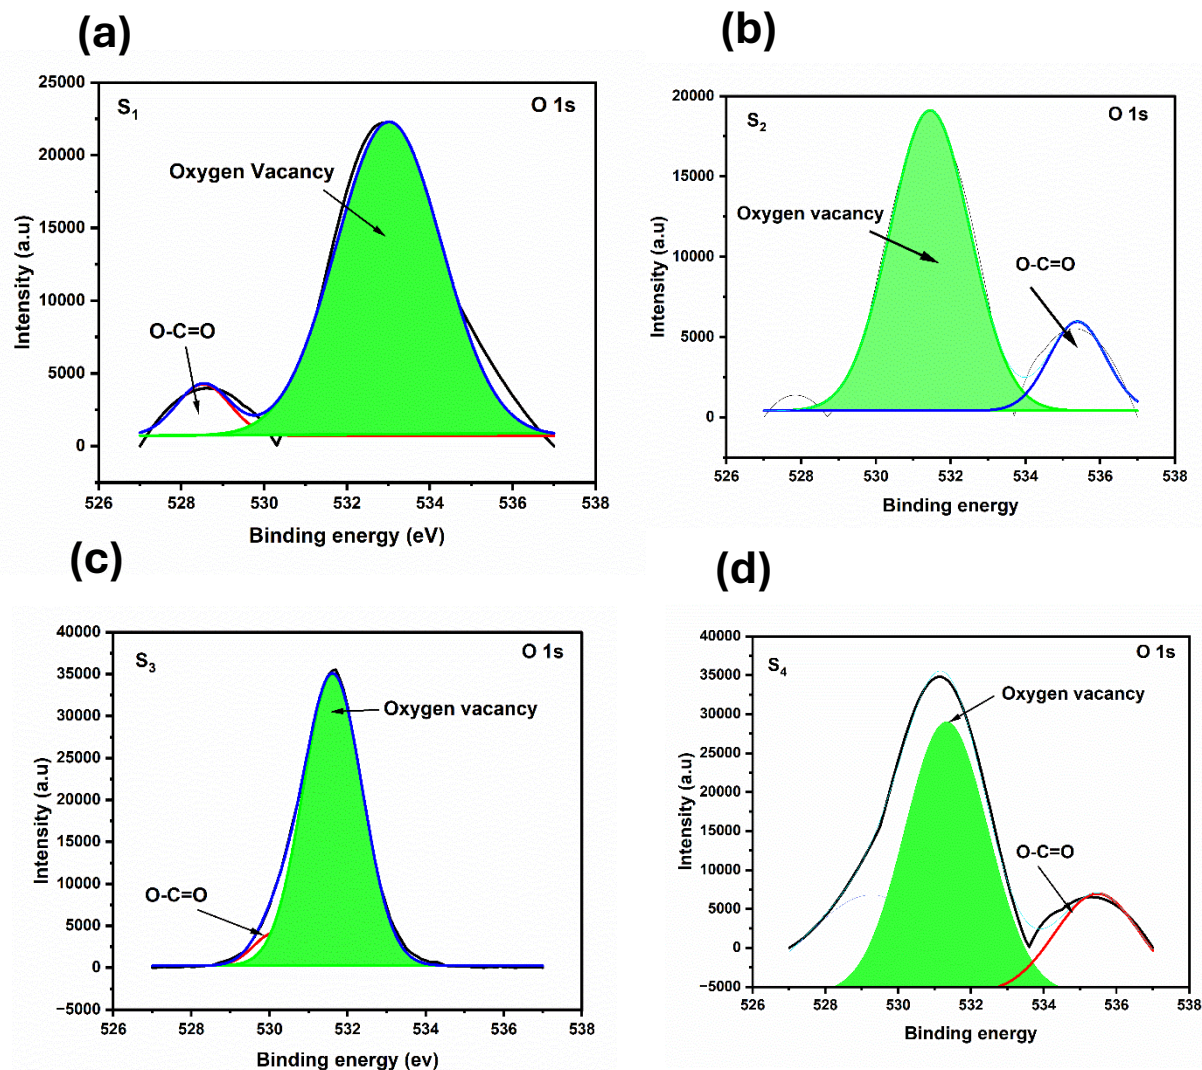

**Fig. S14** Deconvoluted XPS spectra of Oxygen 1s for Ni-Co-Mn-PDC MOFs based on compositions (a) S<sub>1</sub>, (b) S<sub>2</sub>, (c) S<sub>3</sub>, and (d) S<sub>4</sub>, showing presence of Mn<sup>2+</sup>/Mn<sup>3+</sup> redox states.

## References

1. **S2** Xing, J. (2025). Boron-ModifiedNiFe-MOF-74Catalyst for the Oxygen Evolution Reactionin Anion Exchange Membrane Water Electrolyzers. *European chemical societies publishing*, 9.
2. **S2** Lu, T. (2024). Synergistic Effects of Ruthenium and Zinc Active Sites Fine Tune the Electronic Structures of Augmented Electrocatalysis. *Advanced Functional Materials*, 11.
3. **S2** Jamshidi, E. (xyz). Comparative Electrocatalytic Performance of Co-ZIF, Zn-ZIF, and Bimetallic CoZn-ZIF for Water Splitting. *SSRN*, 40.
4. **S11-S14** Goswami, A. (2022 ). In Situ Grown Mn(II) MOF upon Nickel Foam acts as Robust Self- supporting Bifunctional Electrode for Overall Water Splitting: A Bimetallic Synergistic Collaboration Strategy. *ACS Applied Materials & Interfaces*, 16.
